# Supplementary material for: Molecular mechanism of amyloidogenicity and neurotoxicity of a pro-aggregated tau mutant in the presence of histidine tautomerism via replica-exchange simulation
Source: Royal Society of Chemistry journal article supplement (doi:10.1039/d1cp00105a), 2021-01-01
Supplement: d1cp00105a1.pdf [file d1cp00105a1.pdf]

## Electronic Supplementary Information

### Molecular Mechanism of Amyloidogenicity and Neurotoxicity of a Pro-aggregated Tau Mutant in the Presence of Histidine Tautomerism via Replica-Exchange Simulation

*Sompriya Chatterjee<sup>§</sup>, Abbas Salimi<sup>§</sup>, and Jin Yong Lee\**

*Department of Chemistry, Sungkyunkwan University, Suwon 440-746, Korea*

*<sup>§</sup> These authors contributed equally to this work*

*\*Corresponding author: [jinylee@skku.edu](mailto:jinylee@skku.edu) (J. Y. Lee), Orcid ID: 0000-0003-0360-5059*

**Figure S1 [A].** The convergence evaluation of the REMD simulations at 310 K

**Table S1 [A].** Hydrogen bond interactions of histidine for each mutant isomer

**Figure S2 [A].** The convergence evaluation of P301L  $\delta\epsilon$  and  $\epsilon\epsilon$  isomers, at 310 K

**Figure S3 [A].** a) Antiparallel sheet content, b)  $\alpha$ -helical content, c) contact map, and d) clustering of P301L  $\delta\epsilon$  isomer

**Figure S4 [A].** a) Antiparallel sheet content, b)  $\alpha$ -helical content, c) contact map, and d) clustering of P301L  $\epsilon\epsilon$  isomer

( $\delta\delta$ )

# Isomer

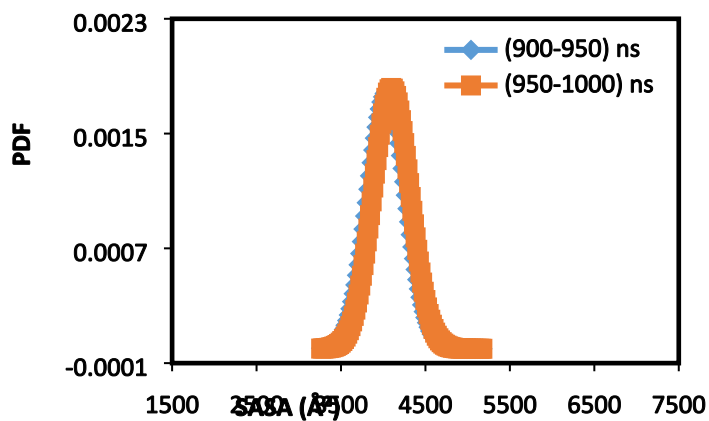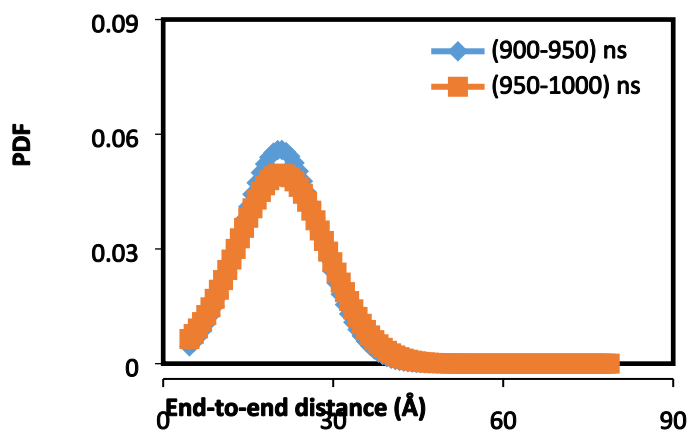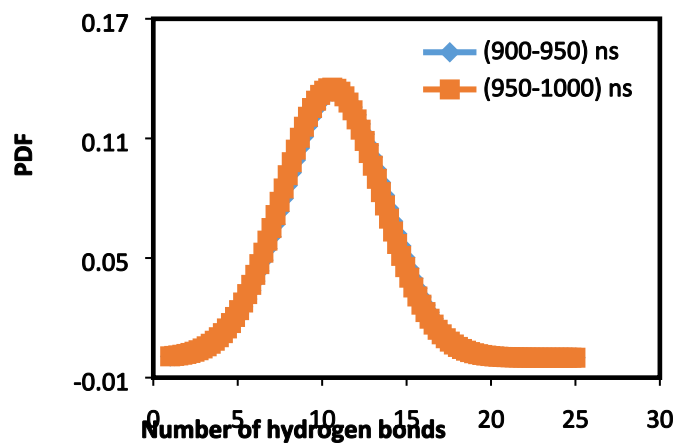

( $\epsilon\epsilon$ )

# Isomer

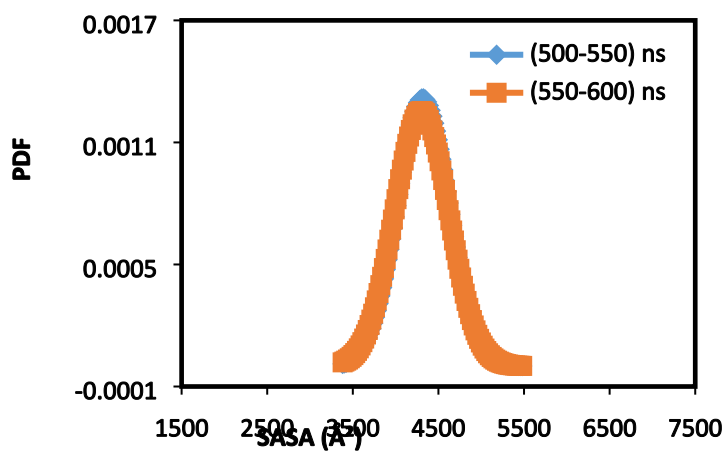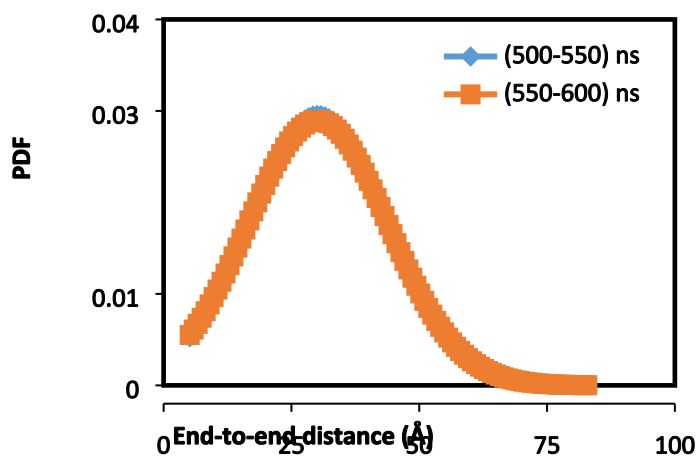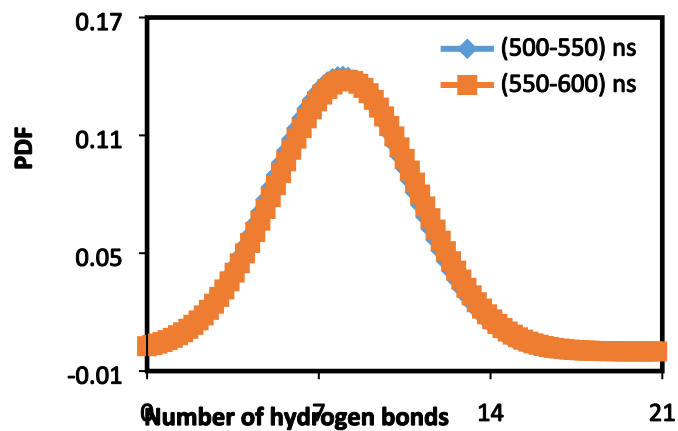

# ( $\delta\varepsilon$ )

## Isomer

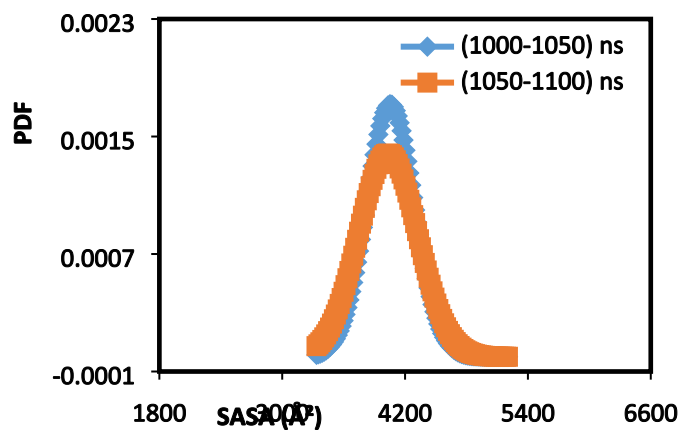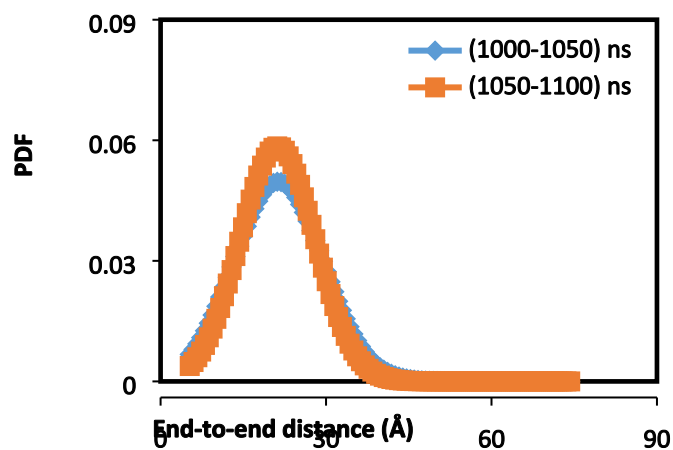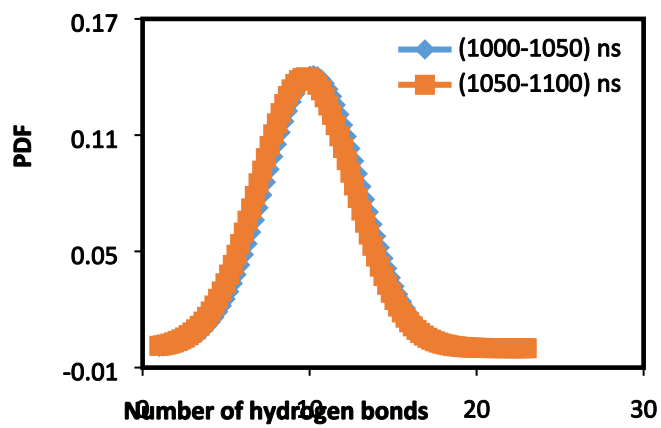

( $\epsilon\delta$ )

# Isomer

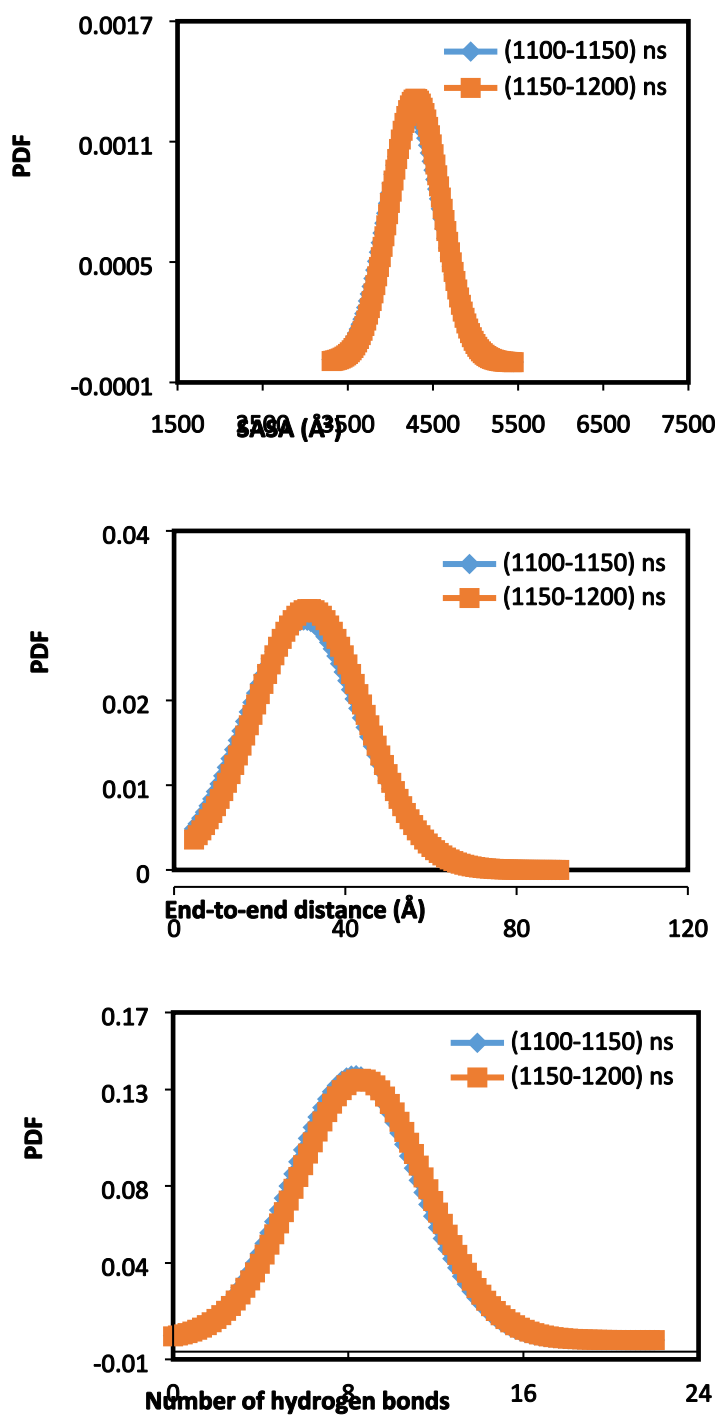

Figure S1 [A]. The convergence evaluation of the REMD simulations at 310 K

Table S1 [A]. Hydrogen bond interactions of histidine for each mutant isomer

## ( $\delta\delta$ ) isomer

### Donor HIS 268

| <b>P</b> | <b>Acceptor</b> | <b>Donor</b> |
|----------|-----------------|--------------|
| 14.22%   | GLN_3@O         | HID_2@ND1    |
| 1.38%    | HID_2@O         | HID_2@ND1    |
| 0.28%    | LYS_1@O         | HID_2@ND1    |
| 0.22%    | PRO_45@O        | HID_2@ND1    |
| 0.18%    | GLN_3@OE1       | HID_2@N      |
| 0.12%    | GLN_3@OE1       | HID_2@ND1    |
| 0.12%    | VAL_33@O        | HID_2@ND1    |
| 0.06%    | PRO_34@O        | HID_2@ND1    |
| 0.06%    | PRO_45@OXT      | HID_2@ND1    |
| 0.04%    | GLY_6@O         | HID_2@ND1    |
| 0.04%    | GLY_35@O        | HID_2@ND1    |
| 0.04%    | TYR_43@O        | HID_2@ND1    |
| 0.02%    | ASP_16@OD1      | HID_2@ND1    |
| 0.02%    | TYR_43@OH       | HID_2@ND1    |
| 0.02%    | GLY_36@O        | HID_2@ND1    |
| 0.02%    | GLN_10@OE1      | HID_2@ND1    |
| 0.02%    | ILE_41@O        | HID_2@ND1    |
| 0.02%    | GLY_35@O        | HID_2@N      |
| 0.02%    | GLN_40@O        | HID_2@ND1    |
| 0.02%    | PRO_45@O        | HID_2@N      |
| 0.02%    | GLY_37@O        | HID_2@N      |

### Acceptor HIS 268

| <b>P</b> | <b>Acceptor</b> | <b>Donor</b> |
|----------|-----------------|--------------|
| 1.38%    | HID_2@O         | HID_2@ND1    |
| 0.94%    | HID_2@O         | GLN_3@NE2    |
| 0.12%    | HID_2@O         | TYR_43@OH    |
| 0.1%     | HID_2@ND1       | GLN_3@N      |
| 0.06%    | HID_2@O         | LYS_1@NZ     |
| 0.06%    | HID_2@NE2       | TYR_43@OH    |
| 0.04%    | HID_2@O         | LYS_1@NZ     |
| 0.02%    | HID_2@NE2       | GLN_3@NE2    |

## Donor HIS 299

| <b>P</b> | <b>Acceptor</b> | <b>Donor</b> |
|----------|-----------------|--------------|
| 15%      | VAL_33@O        | HID_32@ND1   |
| 3.54%    | ASN_29@O        | HID_32@N     |
| 3.02%    | ASN_29@O        | HID_32@ND1   |
| 2.6%     | HID_32@O        | HID_32@ND1   |
| 2.1%     | ASN_29@OD1      | HID_32@N     |
| 1.84%    | ASN_29@OD1      | HID_32@ND1   |
| 1.7%     | ILE_30@O        | HID_32@ND1   |
| 1.62%    | GLN_40@O        | HID_32@N     |
| 1.34%    | SER_26@O        | HID_32@ND1   |
| 1.24%    | GLN_40@OE1      | HID_32@ND1   |
| 1.24%    | ILE_30@O        | HID_32@N     |
| 0.94%    | LYS_31@O        | HID_32@ND1   |
| 0.46%    | ASP_28@OD1      | HID_32@ND1   |
| 0.42%    | ASP_28@OD2      | HID_32@ND1   |
| 0.38%    | SER_26@OG       | HID_32@ND1   |
| 0.34%    | GLY_25@O        | HID_32@ND1   |
| 0.32%    | CYS_24@O        | HID_32@ND1   |
| 0.32%    | GLY_37@O        | HID_32@ND1   |
| 0.18%    | ASP_28@O        | HID_32@ND1   |
| 0.16%    | SER_38@OG       | HID_32@ND1   |
| 0.1%     | TYR_43@O        | HID_32@ND1   |
| 0.1%     | GLY_36@O        | HID_32@ND1   |
| 0.08%    | LYS_23@O        | HID_32@ND1   |
| 0.06%    | VAL_39@O        | HID_32@ND1   |
| 0.04%    | ASP_16@OD2      | HID_32@ND1   |
| 0.04%    | LYS_27@O        | HID_32@ND1   |
| 0.04%    | VAL_20@O        | HID_32@ND1   |
| 0.04%    | SER_22@O        | HID_32@ND1   |
| 0.02%    | PRO_45@OXT      | HID_32@ND1   |
| 0.02%    | VAL_42@O        | HID_32@ND1   |
| 0.02%    | PRO_45@O        | HID_32@ND1   |
| 0.02%    | ILE_41@O        | HID_32@ND1   |
| 0.02%    | LYS_27@O        | HID_32@N     |
| 0.02%    | SER_22@OG       | HID_32@ND1   |

## Acceptor HIS 299

| <b>P</b> | <b>Acceptor</b> | <b>Donor</b> |
|----------|-----------------|--------------|
| 2.6%     | HID_32@O        | HID_32@ND1   |
| 1.8%     | HID_32@O        | ASP_28@N     |
| 1.2%     | HID_32@O        | SER_26@OG    |
| 0.96%    | HID_32@O        | GLN_40@N     |

|       |            |            |
|-------|------------|------------|
| 0.38% | HID_32@O   | GLY_25@N   |
| 0.24% | HID_32@O   | LYS_27@NZ  |
| 0.2%  | HID_32@O   | SER_26@N   |
| 0.16% | HID_32@O   | TYR_43@OH  |
| 0.12% | HID_32@O   | LYS_27@NZ  |
| 0.08% | HID_32@O   | GLN_21@NE2 |
| 0.08% | HID_32@NE2 | ASN_29@ND2 |
| 0.06% | HID_32@O   | LYS_27@NZ  |
| 0.04% | HID_32@O   | ASN_29@ND2 |
| 0.04% | HID_32@NE2 | ASP_28@N   |
| 0.04% | HID_32@NE2 | GLY_25@N   |
| 0.04% | HID_32@NE2 | LYS_27@NZ  |
| 0.04% | HID_32@ND1 | VAL_33@N   |
| 0.04% | HID_32@O   | GLN_3@N    |
| 0.04% | HID_32@O   | ASN_29@N   |
| 0.04% | HID_32@NE2 | LYS_27@NZ  |
| 0.02% | HID_32@O   | GLN_3@NE2  |
| 0.02% | HID_32@NE2 | SER_26@OG  |
| 0.02% | HID_32@O   | GLY_5@N    |
| 0.02% | HID_32@O   | GLN_10@NE2 |
| 0.02% | HID_32@NE2 | ASN_29@ND2 |
| 0.02% | HID_32@NE2 | GLN_40@NE2 |
| 0.02% | HID_32@ND1 | GLN_40@NE2 |
| 0.02% | HID_32@NE2 | ASN_29@N   |
| 0.02% | HID_32@NE2 | GLY_37@N   |

## (εε) isomer

### Donor HIS 268

| <b>P</b> | <b>Acceptor</b> | <b>Donor</b> |
|----------|-----------------|--------------|
| 0.86%    | HIE_2@ND1       | HIE_2@N      |
| 0.4%     | GLY_6@O         | HIE_2@NE2    |
| 0.34%    | GLY_7@O         | HIE_2@NE2    |
| 0.2%     | VAL_42@O        | HIE_2@NE2    |
| 0.1%     | GLN_10@O        | HIE_2@NE2    |
| 0.1%     | GLN_10@OE1      | HIE_2@NE2    |
| 0.08%    | PRO_45@O        | HIE_2@NE2    |
| 0.08%    | ASP_16@OD1      | HIE_2@NE2    |
| 0.06%    | ILE_11@O        | HIE_2@NE2    |
| 0.06%    | VAL_9@O         | HIE_2@NE2    |
| 0.06%    | PRO_45@OXT      | HIE_2@NE2    |
| 0.06%    | VAL_42@O        | HIE_2@N      |
| 0.06%    | SER_38@O        | HIE_2@NE2    |



|       |            |           |
|-------|------------|-----------|
| 0.06% | TYR_43@O   | HIE_2@NE2 |
| 0.04% | ILE_30@O   | HIE_2@NE2 |
| 0.04% | PRO_45@O   | HIE_2@N   |
| 0.04% | PRO_45@OXT | HIE_2@N   |
| 0.04% | GLN_40@O   | HIE_2@NE2 |
| 0.04% | VAL_39@O   | HIE_2@NE2 |
| 0.04% | LYS_8@O    | HIE_2@NE2 |
| 0.02% | PRO_34@O   | HIE_2@NE2 |
| 0.02% | ASP_16@OD1 | HIE_2@N   |
| 0.02% | ASP_16@OD2 | HIE_2@NE2 |
| 0.02% | ASN_13@OD1 | HIE_2@N   |
| 0.02% | TYR_43@OH  | HIE_2@NE2 |
| 0.02% | ASP_16@OD2 | HIE_2@N   |
| 0.02% | SER_22@O   | HIE_2@NE2 |
| 0.02% | ILE_41@O   | HIE_2@N   |
| 0.02% | LYS_44@O   | HIE_2@NE2 |
| 0.02% | LYS_27@O   | HIE_2@NE2 |
| 0.02% | HIE_32@O   | HIE_2@NE2 |
| 0.02% | LYS_14@O   | HIE_2@NE2 |
| 0.02% | ILE_41@O   | HIE_2@NE2 |
| 0.02% | SER_26@O   | HIE_2@NE2 |

### Acceptor HIS 268

| <b>P</b> | <b>Acceptor</b> | <b>Donor</b> |
|----------|-----------------|--------------|
| 3.86%    | HIE_2@ND1       | GLN_3@N      |
| 2.16%    | HIE_2@O         | GLN_3@NE2    |
| 0.86%    | HIE_2@ND1       | HIE_2@N      |
| 0.16%    | HIE_2@O         | GLN_3@NE2    |
| 0.06%    | HIE_2@O         | TYR_43@OH    |
| 0.06%    | HIE_2@O         | LYS_1@NZ     |
| 0.06%    | HIE_2@O         | LYS_1@NZ     |
| 0.06%    | HIE_2@O         | LYS_1@NZ     |
| 0.04%    | HIE_2@ND1       | TYR_43@OH    |
| 0.02%    | HIE_2@O         | GLY_36@N     |

### Donor HIS 299

| <b>P</b> | <b>Acceptor</b> | <b>Donor</b> |
|----------|-----------------|--------------|
| 2.16%    | ASN_29@O        | HIE_32@N     |
| 1.48%    | ILE_30@O        | HIE_32@N     |
| 1.36%    | ASN_29@OD1      | HIE_32@N     |
| 0.88%    | HIE_32@ND1      | HIE_32@N     |
| 0.58%    | ASP_28@O        | HIE_32@N     |

|              |            |            |
|--------------|------------|------------|
| <b>0.56%</b> | LEU_17@O   | HIE_32@N   |
| <b>0.3%</b>  | SER_38@O   | HIE_32@NE2 |
| <b>0.26%</b> | GLN_21@O   | HIE_32@NE2 |
| <b>0.24%</b> | PRO_45@O   | HIE_32@NE2 |
| <b>0.22%</b> | SER_22@OG  | HIE_32@NE2 |
| <b>0.2%</b>  | GLN_40@OE1 | HIE_32@N   |
| <b>0.18%</b> | GLY_36@O   | HIE_32@NE2 |
| <b>0.18%</b> | SER_22@O   | HIE_32@NE2 |
| <b>0.18%</b> | GLN_21@OE1 | HIE_32@NE2 |
| <b>0.16%</b> | PRO_45@OXT | HIE_32@NE2 |
| <b>0.12%</b> | ASP_16@OD2 | HIE_32@NE2 |
| <b>0.12%</b> | ASP_28@OD1 | HIE_32@NE2 |
| <b>0.12%</b> | GLN_40@OE1 | HIE_32@NE2 |
| <b>0.12%</b> | ILE_41@O   | HIE_32@NE2 |
| <b>0.12%</b> | GLN_10@OE1 | HIE_32@NE2 |
| <b>0.1%</b>  | ASN_29@OD1 | HIE_32@NE2 |
| <b>0.08%</b> | ASP_28@OD2 | HIE_32@NE2 |
| <b>0.08%</b> | ASN_29@O   | HIE_32@NE2 |
| <b>0.08%</b> | LYS_14@O   | HIE_32@NE2 |
| <b>0.08%</b> | CYS_24@O   | HIE_32@NE2 |
| <b>0.06%</b> | PRO_4@O    | HIE_32@N   |
| <b>0.06%</b> | PRO_4@O    | HIE_32@NE2 |
| <b>0.06%</b> | LYS_27@O   | HIE_32@NE2 |
| <b>0.04%</b> | SER_26@O   | HIE_32@NE2 |
| <b>0.04%</b> | SER_18@O   | HIE_32@N   |
| <b>0.04%</b> | ASN_13@O   | HIE_32@NE2 |
| <b>0.04%</b> | SER_18@O   | HIE_32@NE2 |
| <b>0.04%</b> | SER_38@OG  | HIE_32@NE2 |
| <b>0.04%</b> | LEU_17@O   | HIE_32@NE2 |
| <b>0.04%</b> | GLY_25@O   | HIE_32@N   |
| <b>0.04%</b> | SER_18@OG  | HIE_32@NE2 |
| <b>0.04%</b> | VAL_42@O   | HIE_32@N   |
| <b>0.02%</b> | ILE_11@O   | HIE_32@NE2 |
| <b>0.02%</b> | GLN_40@O   | HIE_32@NE2 |
| <b>0.02%</b> | ASN_19@O   | HIE_32@N   |
| <b>0.02%</b> | GLN_10@O   | HIE_32@NE2 |
| <b>0.02%</b> | VAL_20@O   | HIE_32@NE2 |
| <b>0.02%</b> | ASP_16@O   | HIE_32@NE2 |
| <b>0.02%</b> | ASN_19@OD1 | HIE_32@NE2 |
| <b>0.02%</b> | SER_26@OG  | HIE_32@NE2 |
| <b>0.02%</b> | ASP_16@OD1 | HIE_32@NE2 |
| <b>0.02%</b> | VAL_39@O   | HIE_32@NE2 |
| <b>0.02%</b> | GLY_37@O   | HIE_32@NE2 |
| <b>0.02%</b> | LYS_44@O   | HIE_32@NE2 |
| <b>0.02%</b> | TYR_43@OH  | HIE_32@N   |

|       |            |            |
|-------|------------|------------|
| 0.02% | LYS_23@O   | HIE_32@NE2 |
| 0.02% | GLY_7@O    | HIE_32@N   |
| 0.02% | LYS_23@O   | HIE_32@N   |
| 0.02% | GLY_25@O   | HIE_32@NE2 |
| 0.02% | GLN_40@O   | HIE_32@N   |
| 0.02% | GLN_21@OE1 | HIE_32@N   |

### Acceptor HIS 299

| <b>P</b> | <b>Acceptor</b> | <b>Donor</b> |
|----------|-----------------|--------------|
| 2.1%     | HIE_32@ND1      | VAL_33@N     |
| 1.16%    | HIE_32@O        | SER_26@OG    |
| 0.88%    | HIE_32@ND1      | HIE_32@N     |
| 0.5%     | HIE_32@O        | TYR_43@OH    |
| 0.32%    | HIE_32@O        | ASN_29@ND2   |
| 0.28%    | HIE_32@ND1      | SER_26@OG    |
| 0.14%    | HIE_32@O        | GLY_25@N     |
| 0.14%    | HIE_32@O        | SER_26@N     |
| 0.1%     | HIE_32@O        | GLN_21@NE2   |
| 0.08%    | HIE_32@O        | SER_18@OG    |
| 0.08%    | HIE_32@ND1      | SER_38@OG    |
| 0.08%    | HIE_32@O        | ILE_41@N     |
| 0.08%    | HIE_32@O        | GLY_7@N      |
| 0.08%    | HIE_32@ND1      | GLN_21@NE2   |
| 0.06%    | HIE_32@O        | TYR_43@N     |
| 0.06%    | HIE_32@O        | LYS_31@NZ    |
| 0.04%    | HIE_32@O        | GLY_5@N      |
| 0.04%    | HIE_32@O        | ASN_19@ND2   |
| 0.04%    | HIE_32@ND1      | ASN_29@ND2   |
| 0.04%    | HIE_32@ND1      | ASN_29@ND2   |
| 0.04%    | HIE_32@O        | ASN_29@ND2   |
| 0.04%    | HIE_32@O        | LYS_31@NZ    |
| 0.04%    | HIE_32@O        | GLN_40@NE2   |
| 0.02%    | HIE_32@O        | LYS_27@N     |
| 0.02%    | HIE_32@O        | LYS_8@NZ     |
| 0.02%    | HIE_32@O        | LYS_23@NZ    |
| 0.02%    | HIE_32@ND1      | TYR_43@OH    |
| 0.02%    | HIE_32@O        | GLN_10@NE2   |
| 0.02%    | HIE_32@O        | HIE_2@NE2    |
| 0.02%    | HIE_32@O        | LYS_27@NZ    |
| 0.02%    | HIE_32@ND1      | GLN_40@NE2   |
| 0.02%    | HIE_32@O        | LYS_31@NZ    |
| 0.02%    | HIE_32@ND1      | GLN_21@NE2   |
| 0.02%    | HIE_32@ND1      | SER_26@N     |
| 0.02%    | HIE_32@O        | LYS_23@NZ    |

|       |          |           |
|-------|----------|-----------|
| 0.02% | HIE_32@O | SER_38@OG |
|-------|----------|-----------|

## ( $\delta\epsilon$ ) isomer

### Donor HIS 268

| <b>P</b> | <b>Acceptor</b> | <b>Donor</b> |
|----------|-----------------|--------------|
| 13.78%   | GLN_3@O         | HID_2@ND1    |
| 1.48%    | HID_2@O         | HID_2@ND1    |
| 0.5%     | LYS_1@O         | HID_2@ND1    |
| 0.16%    | PRO_34@O        | HID_2@ND1    |
| 0.06%    | PRO_45@OXT      | HID_2@ND1    |
| 0.04%    | ASP_16@OD1      | HID_2@ND1    |
| 0.04%    | GLY_6@O         | HID_2@ND1    |
| 0.04%    | PRO_45@O        | HID_2@ND1    |
| 0.02%    | GLN_10@OE1      | HID_2@ND1    |
| 0.02%    | GLY_35@O        | HID_2@ND1    |
| 0.02%    | ASP_16@OD2      | HID_2@ND1    |
| 0.02%    | LYS_31@O        | HID_2@N      |
| 0.02%    | VAL_42@O        | HID_2@ND1    |
| 0.02%    | GLN_3@OE1       | HID_2@ND1    |
| 0.02%    | HIE_32@O        | HID_2@ND1    |
| 0.02%    | GLN_3@OE1       | HID_2@N      |
| 0.02%    | CYS_24@O        | HID_2@ND1    |
| 0.02%    | LYS_31@O        | HID_2@ND1    |

### Acceptor HIS 268

| <b>P</b> | <b>Acceptor</b> | <b>Donor</b> |
|----------|-----------------|--------------|
| 1.48%    | HID_2@O         | HID_2@ND1    |
| 1.1%     | HID_2@O         | GLN_3@NE2    |
| 0.08%    | HID_2@O         | GLN_3@NE2    |
| 0.06%    | HID_2@O         | LYS_1@NZ     |
| 0.04%    | HID_2@O         | TYR_43@OH    |
| 0.04%    | HID_2@NE2       | TYR_43@OH    |
| 0.04%    | HID_2@ND1       | GLN_3@N      |
| 0.02%    | HID_2@O         | GLY_36@N     |
| 0.02%    | HID_2@NE2       | GLY_36@N     |
| 0.02%    | HID_2@NE2       | LYS_44@NZ    |
| 0.02%    | HID_2@O         | LYS_1@NZ     |
| 0.02%    | HID_2@O         | LYS_1@NZ     |

### Donor HIS 299

| <b>P</b> | <b>Acceptor</b> | <b>Donor</b> |
|----------|-----------------|--------------|
| 1.6%     | GLN_40@OE1      | HIE_32@NE2   |
| 0.9%     | GLY_36@O        | HIE_32@NE2   |
| 0.74%    | ILE_30@O        | HIE_32@N     |
| 0.74%    | ASN_29@O        | HIE_32@N     |
| 0.68%    | ASN_29@OD1      | HIE_32@N     |
| 0.6%     | HIE_32@ND1      | HIE_32@N     |
| 0.28%    | GLY_37@O        | HIE_32@NE2   |
| 0.1%     | TYR_43@O        | HIE_32@NE2   |
| 0.06%    | ASP_16@OD2      | HIE_32@NE2   |
| 0.04%    | SER_18@OG       | HIE_32@NE2   |
| 0.04%    | ASP_28@OD1      | HIE_32@NE2   |
| 0.04%    | GLN_21@OE1      | HIE_32@NE2   |
| 0.04%    | GLN_3@OE1       | HIE_32@N     |
| 0.04%    | LYS_27@O        | HIE_32@NE2   |
| 0.04%    | ASP_16@OD1      | HIE_32@NE2   |
| 0.04%    | ASP_28@OD2      | HIE_32@NE2   |
| 0.04%    | LYS_23@O        | HIE_32@NE2   |
| 0.04%    | SER_18@O        | HIE_32@NE2   |
| 0.04%    | GLN_21@O        | HIE_32@NE2   |
| 0.02%    | ILE_41@O        | HIE_32@N     |
| 0.02%    | PRO_4@O         | HIE_32@NE2   |
| 0.02%    | LYS_14@O        | HIE_32@NE2   |
| 0.02%    | VAL_39@O        | HIE_32@NE2   |
| 0.02%    | ILE_12@O        | HIE_32@NE2   |
| 0.02%    | ILE_41@O        | HIE_32@NE2   |
| 0.02%    | GLY_25@O        | HIE_32@NE2   |
| 0.02%    | ASN_13@OD1      | HIE_32@NE2   |
| 0.02%    | SER_22@OG       | HIE_32@NE2   |
| 0.02%    | ASP_28@O        | HIE_32@NE2   |
| 0.02%    | SER_38@O        | HIE_32@NE2   |
| 0.02%    | ASN_29@OD1      | HIE_32@NE2   |
| 0.02%    | ASP_28@O        | HIE_32@N     |
| 0.02%    | SER_26@OG       | HIE_32@NE2   |

### Acceptor HIS 299

| <b>P</b> | <b>Acceptor</b> | <b>Donor</b> |
|----------|-----------------|--------------|
| 1.58%    | HIE_32@ND1      | VAL_33@N     |
| 0.66%    | HIE_32@ND1      | GLN_40@NE2   |
| 0.6%     | HIE_32@ND1      | HIE_32@N     |

|       |            |            |
|-------|------------|------------|
| 0.12% | HIE_32@ND1 | GLN_40@NE2 |
| 0.08% | HIE_32@ND1 | SER_38@OG  |
| 0.06% | HIE_32@O   | SER_26@OG  |
| 0.04% | HIE_32@O   | SER_22@OG  |
| 0.04% | HIE_32@O   | GLY_36@N   |
| 0.04% | HIE_32@O   | LYS_31@NZ  |
| 0.04% | HIE_32@O   | ASN_19@ND2 |
| 0.04% | HIE_32@ND1 | ASN_29@ND2 |
| 0.02% | HIE_32@O   | SER_18@OG  |
| 0.02% | HIE_32@O   | GLN_21@NE2 |
| 0.02% | HIE_32@O   | HID_2@ND1  |
| 0.02% | HIE_32@O   | GLN_21@NE2 |
| 0.02% | HIE_32@O   | LYS_8@NZ   |
| 0.02% | HIE_32@ND1 | ASN_13@N   |
| 0.02% | HIE_32@O   | GLN_3@NE2  |
| 0.02% | HIE_32@O   | LYS_31@NZ  |
| 0.02% | HIE_32@O   | GLY_5@N    |
| 0.02% | HIE_32@O   | TYR_43@OH  |
| 0.02% | HIE_32@O   | LYS_14@NZ  |
| 0.02% | HIE_32@ND1 | ASN_29@ND2 |
| 0.02% | HIE_32@ND1 | ASN_13@ND2 |

## (εδ) isomer

### Donor HIS 268

| P     | Acceptor   | Donor     |
|-------|------------|-----------|
| 0.5%  | HIE_2@ND1  | HIE_2@N   |
| 0.48% | GLY_6@O    | HIE_2@NE2 |
| 0.26% | PRO_45@OXT | HIE_2@NE2 |
| 0.26% | ASP_16@OD2 | HIE_2@NE2 |
| 0.18% | VAL_42@O   | HIE_2@NE2 |
| 0.12% | PRO_34@O   | HIE_2@NE2 |
| 0.1%  | TYR_43@O   | HIE_2@NE2 |
| 0.1%  | ILE_41@O   | HIE_2@NE2 |
| 0.08% | LEU_17@O   | HIE_2@NE2 |
| 0.08% | PRO_45@O   | HIE_2@NE2 |
| 0.08% | ILE_11@O   | HIE_2@NE2 |
| 0.08% | VAL_9@O    | HIE_2@NE2 |
| 0.06% | CYS_24@O   | HIE_2@N   |
| 0.06% | GLY_7@O    | HIE_2@NE2 |
| 0.04% | ASP_16@O   | HIE_2@NE2 |
| 0.04% | GLY_5@O    | HIE_2@NE2 |
| 0.04% | VAL_20@O   | HIE_2@NE2 |

|       |           |           |
|-------|-----------|-----------|
| 0.04% | SER_22@O  | HIE_2@NE2 |
| 0.02% | VAL_39@O  | HIE_2@NE2 |
| 0.02% | GLY_36@O  | HIE_2@NE2 |
| 0.02% | SER_18@O  | HIE_2@NE2 |
| 0.02% | GLN_3@OE1 | HIE_2@N   |
| 0.02% | GLY_35@O  | HIE_2@NE2 |
| 0.02% | LYS_8@O   | HIE_2@NE2 |
| 0.02% | LYS_44@O  | HIE_2@NE2 |
| 0.02% | ILE_12@O  | HIE_2@NE2 |
| 0.02% | GLN_40@O  | HIE_2@NE2 |
| 0.02% | LYS_23@O  | HIE_2@NE2 |
| 0.02% | GLN_10@O  | HIE_2@NE2 |
| 0.02% | SER_26@O  | HIE_2@NE2 |

### Acceptor HIS 268

| <b>P</b> | <b>Acceptor</b> | <b>Donor</b> |
|----------|-----------------|--------------|
| 4%       | HIE_2@ND1       | GLN_3@N      |
| 2.02%    | HIE_2@O         | GLN_3@NE2    |
| 0.5%     | HIE_2@ND1       | HIE_2@N      |
| 0.14%    | HIE_2@O         | SER_26@OG    |
| 0.04%    | HIE_2@O         | TYR_43@OH    |
| 0.04%    | HIE_2@O         | LYS_1@NZ     |
| 0.04%    | HIE_2@O         | GLN_3@NE2    |
| 0.02%    | HIE_2@O         | GLN_21@NE2   |
| 0.02%    | HIE_2@O         | LYS_1@NZ     |
| 0.02%    | HIE_2@O         | LYS_1@NZ     |
| 0.02%    | HIE_2@ND1       | GLN_40@NE2   |

### Donor HIS 299

| <b>P</b> | <b>Acceptor</b> | <b>Donor</b> |
|----------|-----------------|--------------|
| 5.08%    | VAL_33@O        | HID_32@ND1   |
| 4.12%    | ILE_30@O        | HID_32@ND1   |
| 3.64%    | ASP_28@OD1      | HID_32@ND1   |
| 3.42%    | ASP_28@OD2      | HID_32@ND1   |
| 2.84%    | ASP_28@O        | HID_32@N     |
| 2.5%     | HID_32@O        | HID_32@ND1   |
| 2.46%    | GLN_40@OE1      | HID_32@ND1   |
| 2.06%    | ASN_29@O        | HID_32@N     |
| 1.5%     | ASP_28@O        | HID_32@ND1   |
| 1.44%    | ASN_29@O        | HID_32@ND1   |
| 1.2%     | LYS_31@O        | HID_32@ND1   |
| 0.9%     | GLY_37@O        | HID_32@ND1   |

|       |            |            |
|-------|------------|------------|
| 0.72% | ILE_30@O   | HID_32@N   |
| 0.64% | ILE_41@O   | HID_32@ND1 |
| 0.56% | GLN_40@O   | HID_32@ND1 |
| 0.44% | ASN_29@OD1 | HID_32@N   |
| 0.32% | SER_22@O   | HID_32@ND1 |
| 0.26% | SER_38@OG  | HID_32@ND1 |
| 0.26% | ASN_13@O   | HID_32@ND1 |
| 0.22% | SER_26@O   | HID_32@ND1 |
| 0.2%  | ASN_29@OD1 | HID_32@ND1 |
| 0.18% | CYS_24@O   | HID_32@ND1 |
| 0.14% | TYR_43@O   | HID_32@ND1 |
| 0.14% | VAL_39@O   | HID_32@ND1 |
| 0.12% | VAL_20@O   | HID_32@ND1 |
| 0.08% | ASN_19@O   | HID_32@ND1 |
| 0.08% | VAL_42@O   | HID_32@ND1 |
| 0.06% | TYR_43@OH  | HID_32@ND1 |
| 0.04% | VAL_42@O   | HID_32@N   |
| 0.04% | GLN_21@O   | HID_32@ND1 |
| 0.04% | LYS_23@O   | HID_32@ND1 |
| 0.04% | SER_18@OG  | HID_32@ND1 |
| 0.04% | ASN_19@OD1 | HID_32@ND1 |
| 0.04% | ASP_16@OD1 | HID_32@ND1 |
| 0.04% | GLY_25@O   | HID_32@ND1 |
| 0.02% | LYS_44@O   | HID_32@ND1 |
| 0.02% | ILE_11@O   | HID_32@ND1 |
| 0.02% | LYS_27@O   | HID_32@ND1 |
| 0.02% | SER_38@O   | HID_32@ND1 |
| 0.02% | VAL_33@N   | HID_32@ND1 |
| 0.02% | CYS_24@O   | HID_32@N   |

### Acceptor HIS 299

| <b>P</b> | <b>Acceptor</b> | <b>Donor</b> |
|----------|-----------------|--------------|
| 2.5%     | HID_32@O        | HID_32@ND1   |
| 0.46%    | HID_32@O        | SER_26@OG    |
| 0.2%     | HID_32@O        | TYR_43@OH    |
| 0.12%    | HID_32@O        | SER_26@N     |
| 0.1%     | HID_32@NE2      | GLN_40@NE2   |
| 0.06%    | HID_32@O        | SER_22@OG    |
| 0.06%    | HID_32@O        | ASN_29@ND2   |
| 0.04%    | HID_32@O        | SER_18@OG    |
| 0.04%    | HID_32@O        | TYR_43@N     |
| 0.04%    | HID_32@O        | GLN_3@NE2    |
| 0.04%    | HID_32@O        | GLN_3@NE2    |
| 0.04%    | HID_32@NE2      | SER_26@OG    |



|              |            |            |
|--------------|------------|------------|
| <b>0.04%</b> | HID_32@O   | LYS_31@NZ  |
| <b>0.02%</b> | HID_32@O   | LYS_31@NZ  |
| <b>0.02%</b> | HID_32@NE2 | LYS_14@NZ  |
| <b>0.02%</b> | HID_32@O   | LYS_31@NZ  |
| <b>0.02%</b> | HID_32@NE2 | GLN_21@NE2 |
| <b>0.02%</b> | HID_32@O   | GLY_5@N    |
| <b>0.02%</b> | HID_32@O   | GLN_40@NE2 |
| <b>0.02%</b> | HID_32@O   | ASN_29@ND2 |
| <b>0.02%</b> | HID_32@NE2 | ASN_13@ND2 |
| <b>0.02%</b> | HID_32@O   | LYS_14@NZ  |
| <b>0.02%</b> | HID_32@O   | GLN_21@NE2 |
| <b>0.02%</b> | HID_32@NE2 | ASN_13@ND2 |
| <b>0.02%</b> | HID_32@O   | GLY_25@N   |
| <b>0.02%</b> | HID_32@NE2 | LYS_27@NZ  |
| <b>0.02%</b> | HID_32@O   | LYS_23@NZ  |

# P301L ( $\delta\epsilon$ ) Isomer

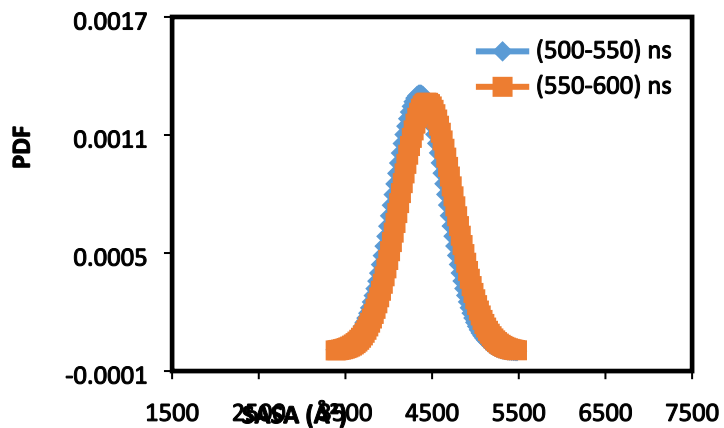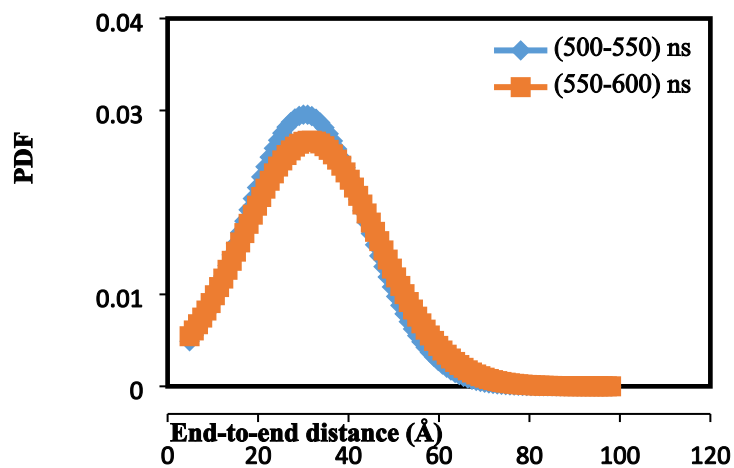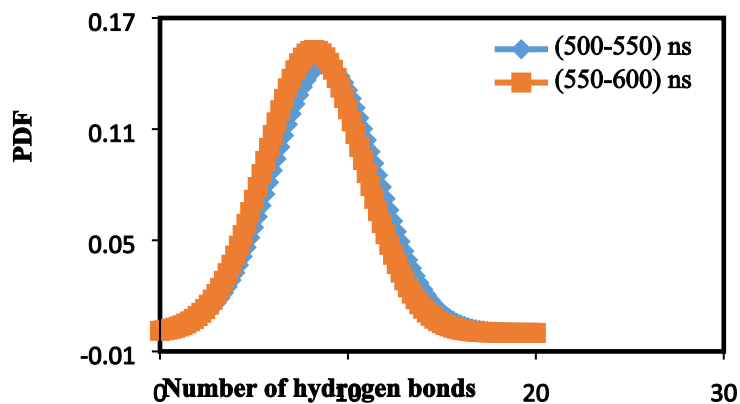

# P301L ( $\epsilon\epsilon$ ) Isomer

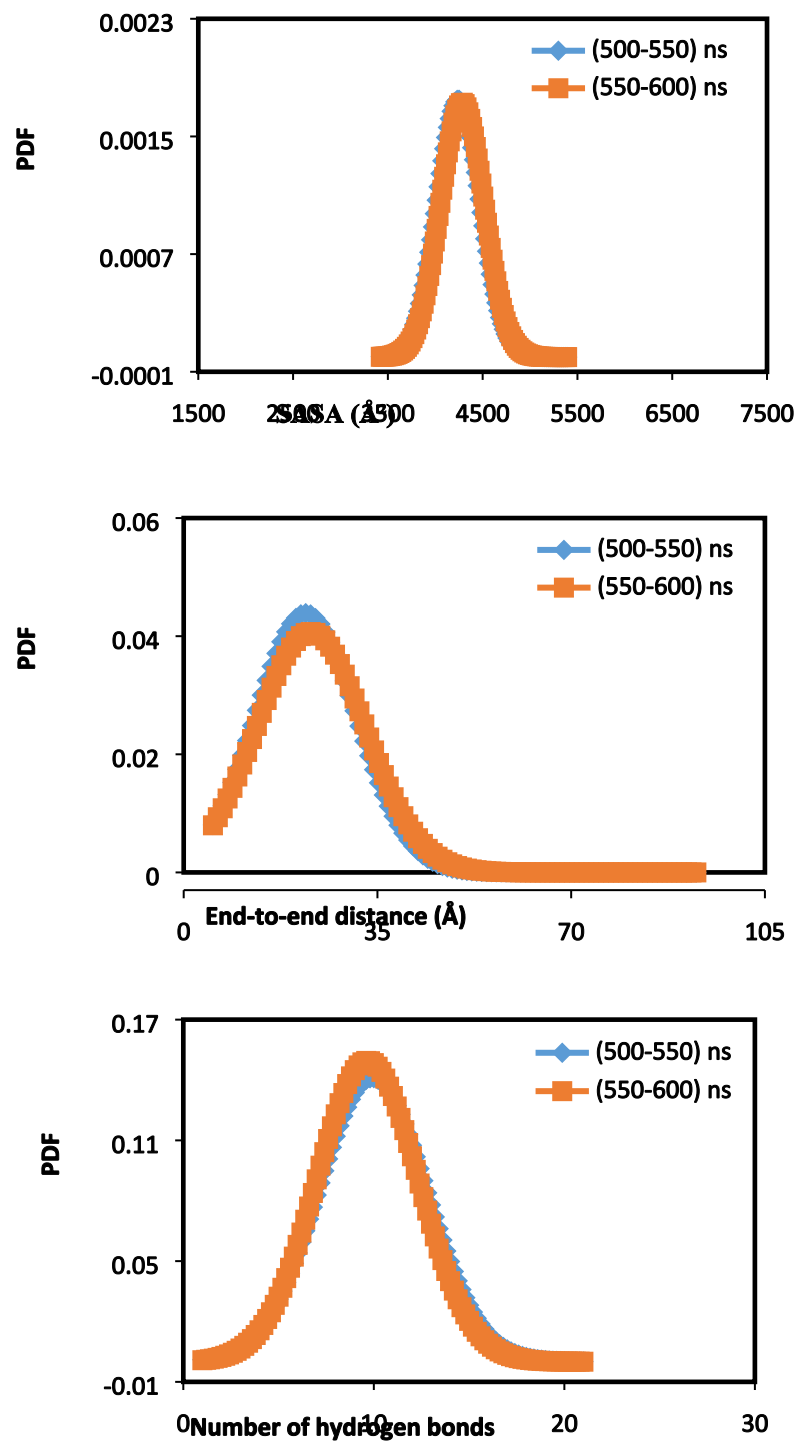

Figure S2 [A]. The convergence evaluation of P301L  $\delta\epsilon$  and  $\epsilon\epsilon$  isomers, at 310 K

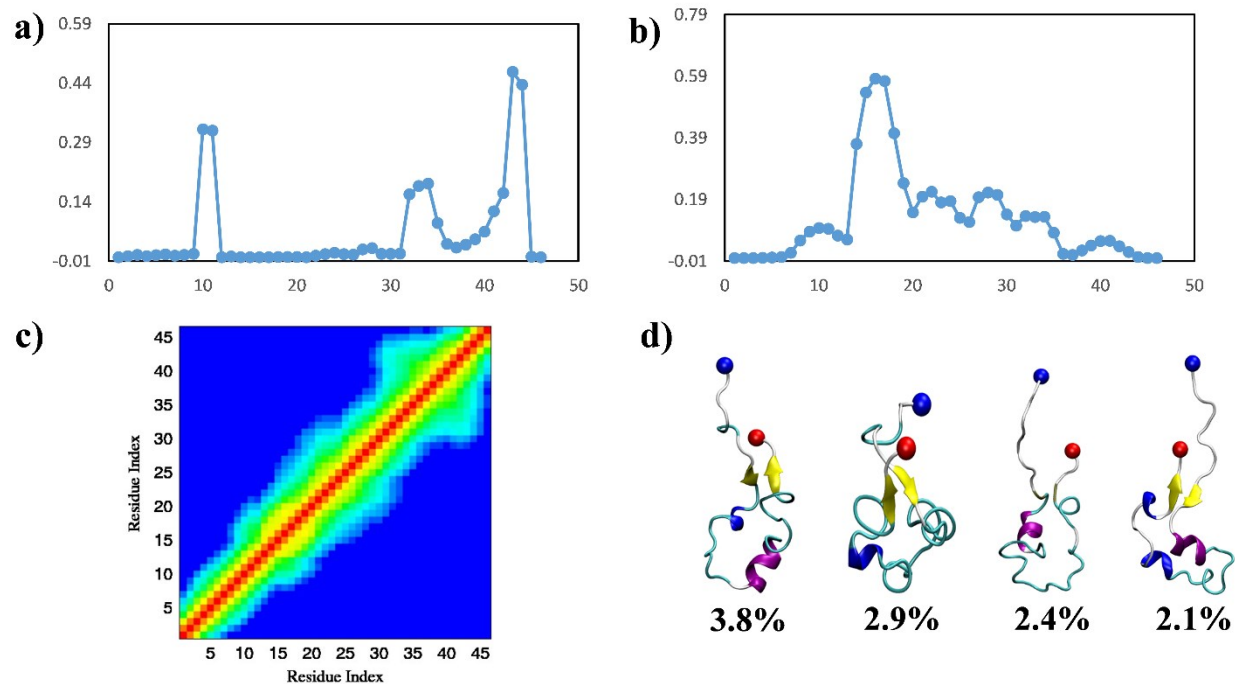

**Figure S3 [A].** a) Antiparallel sheet content, b)  $\alpha$ -helical content, c) contact map, and d) clustering of P301L  $\delta\epsilon$  isomer

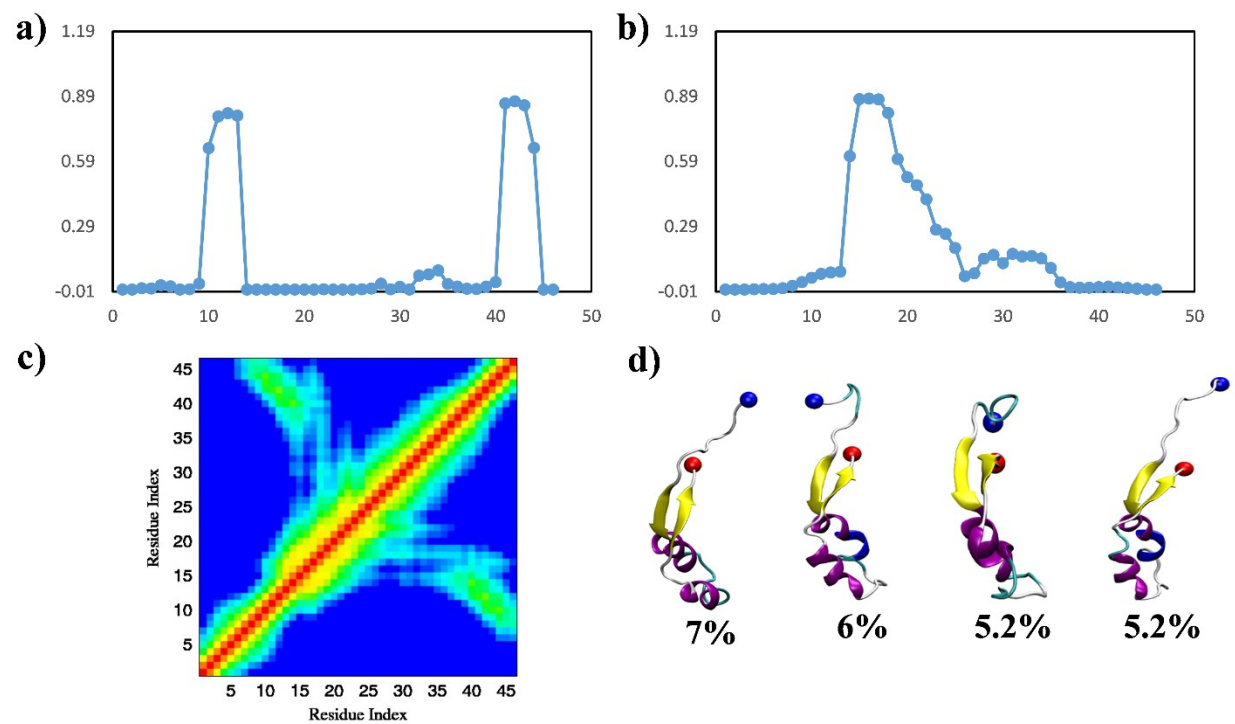

**Figure S4 [A].** a) Antiparallel sheet content, b)  $\alpha$ -helical content, c) contact map, and d) clustering of P301L  $\epsilon\epsilon$  isomer
